# Supplementary material for: Contribution of the nos-pdt Operon to Virulence Phenotypes in Methicillin-Sensitive Staphylococcus aureus
Source: PubMed Central journal article supplement (PMC4183505; doi:10.1371/journal.pone.0108868), 2014-10-02
Supplement: pone.0108868.s001.pdf [file pone.0108868.s001.pdf]

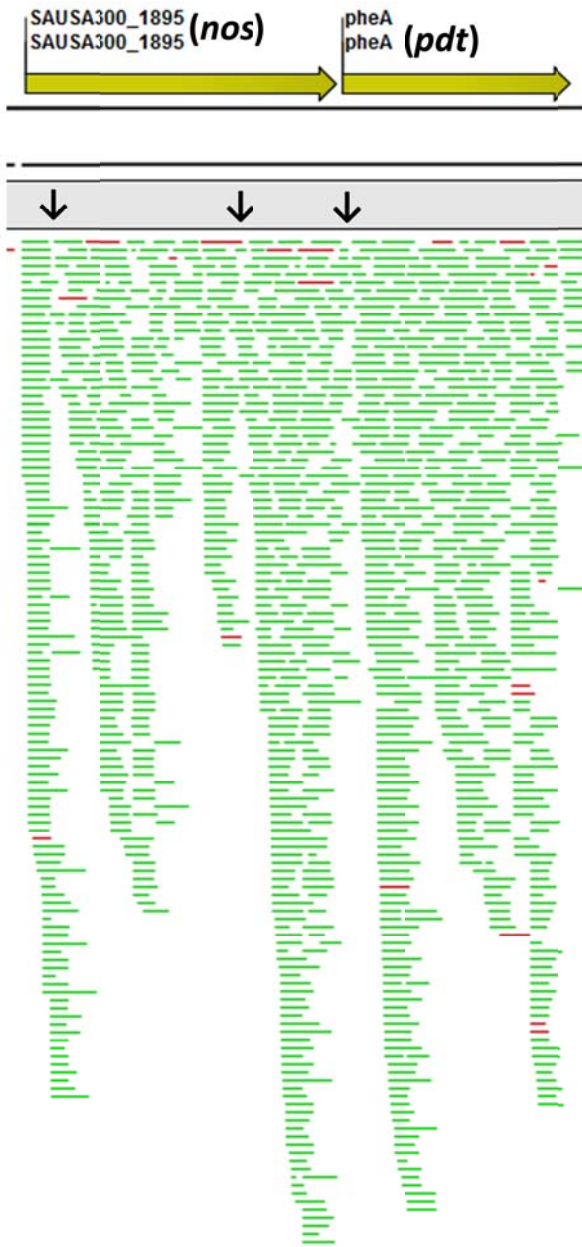

**Figure S1. Expression of the *nos-pdt* operon in *S. aureus* USA300 HOU as assessed by RNA-seq analysis.** Data depicted in this figure was generated as part of a previously-published RNA-seq study [39], whereby RNA from 3 hour TSB cultures of strain USA300 HOU was subjected to Ion Torrent sequencing and resulting reads were aligned to the USA300 FPR genome. Arrows represent potential internal promoters and/or RNA processing sites.

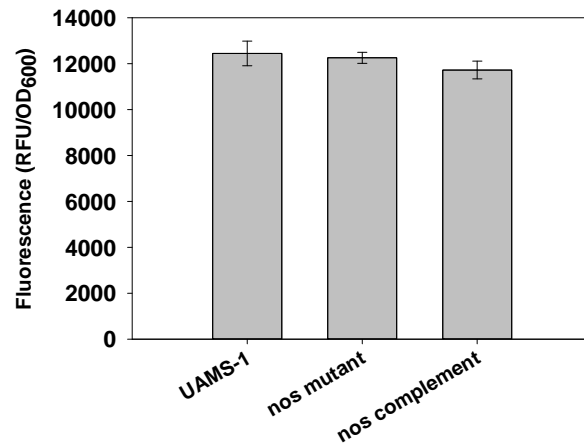

**Figure S2. Detection of intracellular NO/RNS in low-oxygen cultures.** UAMS-1 (pMK4), KR1010 (*nos::erm* mutant; pMK4), and KR1010 (complement; pMKnos) were grown as low-oxygen TSB cultures for 6.25 hours, followed by harvesting and resuspension in HBSS + 5  $\mu$ M DAF-FM dicaetate as described in Materials and Methods. Fluorescence (RFU) and OD<sub>600</sub> readings were recorded after 90 minutes incubation in a microplate reader. Data represents the average of n=3 independent experiments, error bars = SEM.
